# Supplementary material for: Pectobacterium versatile Bacteriophage Possum: A Complex Polysaccharide-Deacetylating Tail Fiber as a Tool for Host Recognition in Pectobacterial Schitoviridae
Source: MDPI journal article supplement (doi:10.3390/ijms231911043), 2022-09-20
Supplement: s1 [file s1]

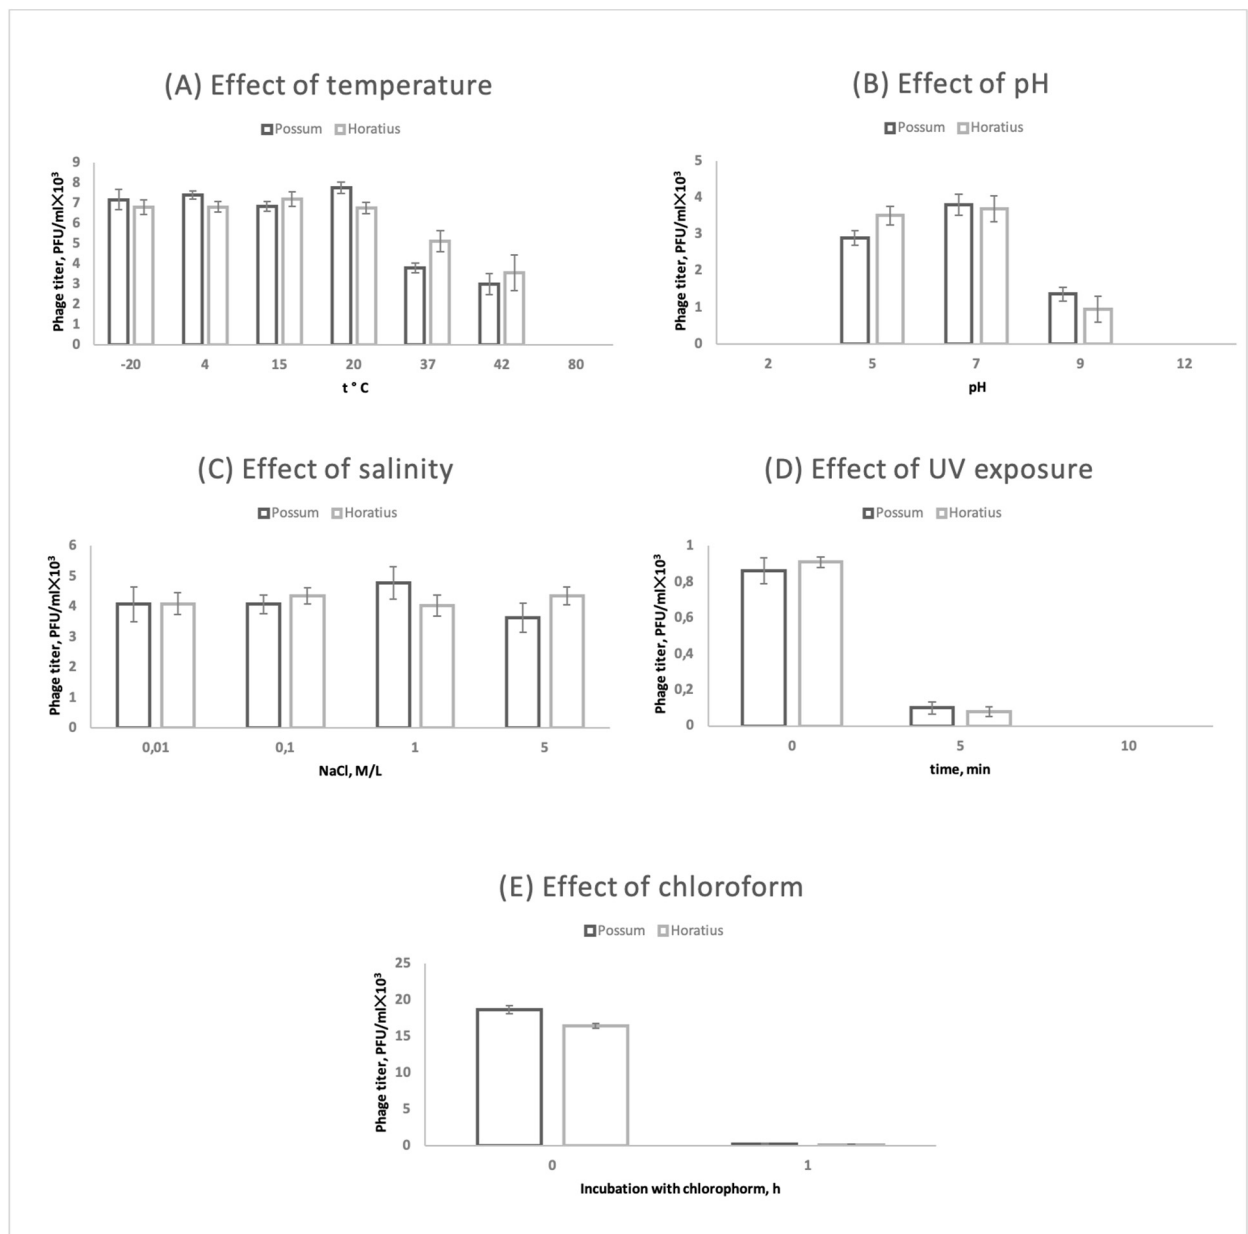

Resistance of bacteriophages Possum and Horatius to environmental factors - temperature, pH, salinity, ultraviolet radiation and chloroform treatment

**Figure S1.** Resistance of bacteriophages Possum and Horatius to environmental factors: temperature, pH, salinity, ultraviolet radiation, and chloroform treatment.

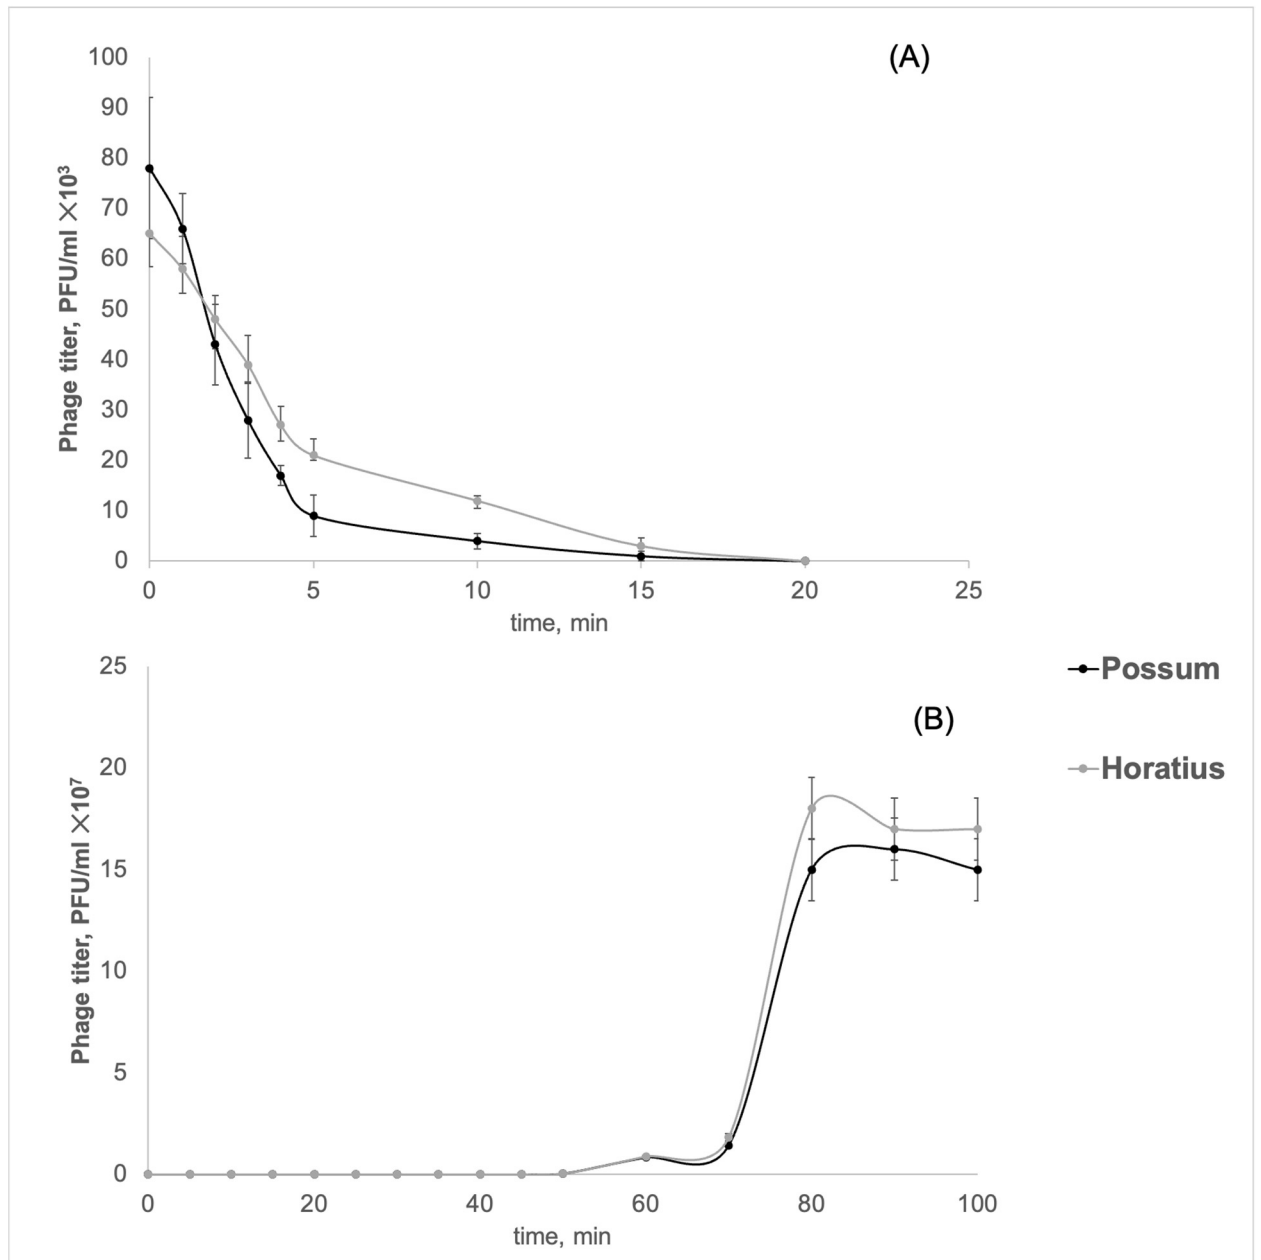

Adsorption curve (top) and One Step Growth (bottom) of bacteriophages Possum and Horatius using *P. versatile* F131 isolation host at 28°C with MOI = 0.001 and 0.01 for adsorption and OSG, respectively

**Figure S2.** Adsorption curve (A) and one-step growth (B) of bacteriophages Possum and Horatius using *P. versatile* F131 isolation host at 28 °C with MOI = 0.001 and 0.01 for adsorption and OSG, respectively.

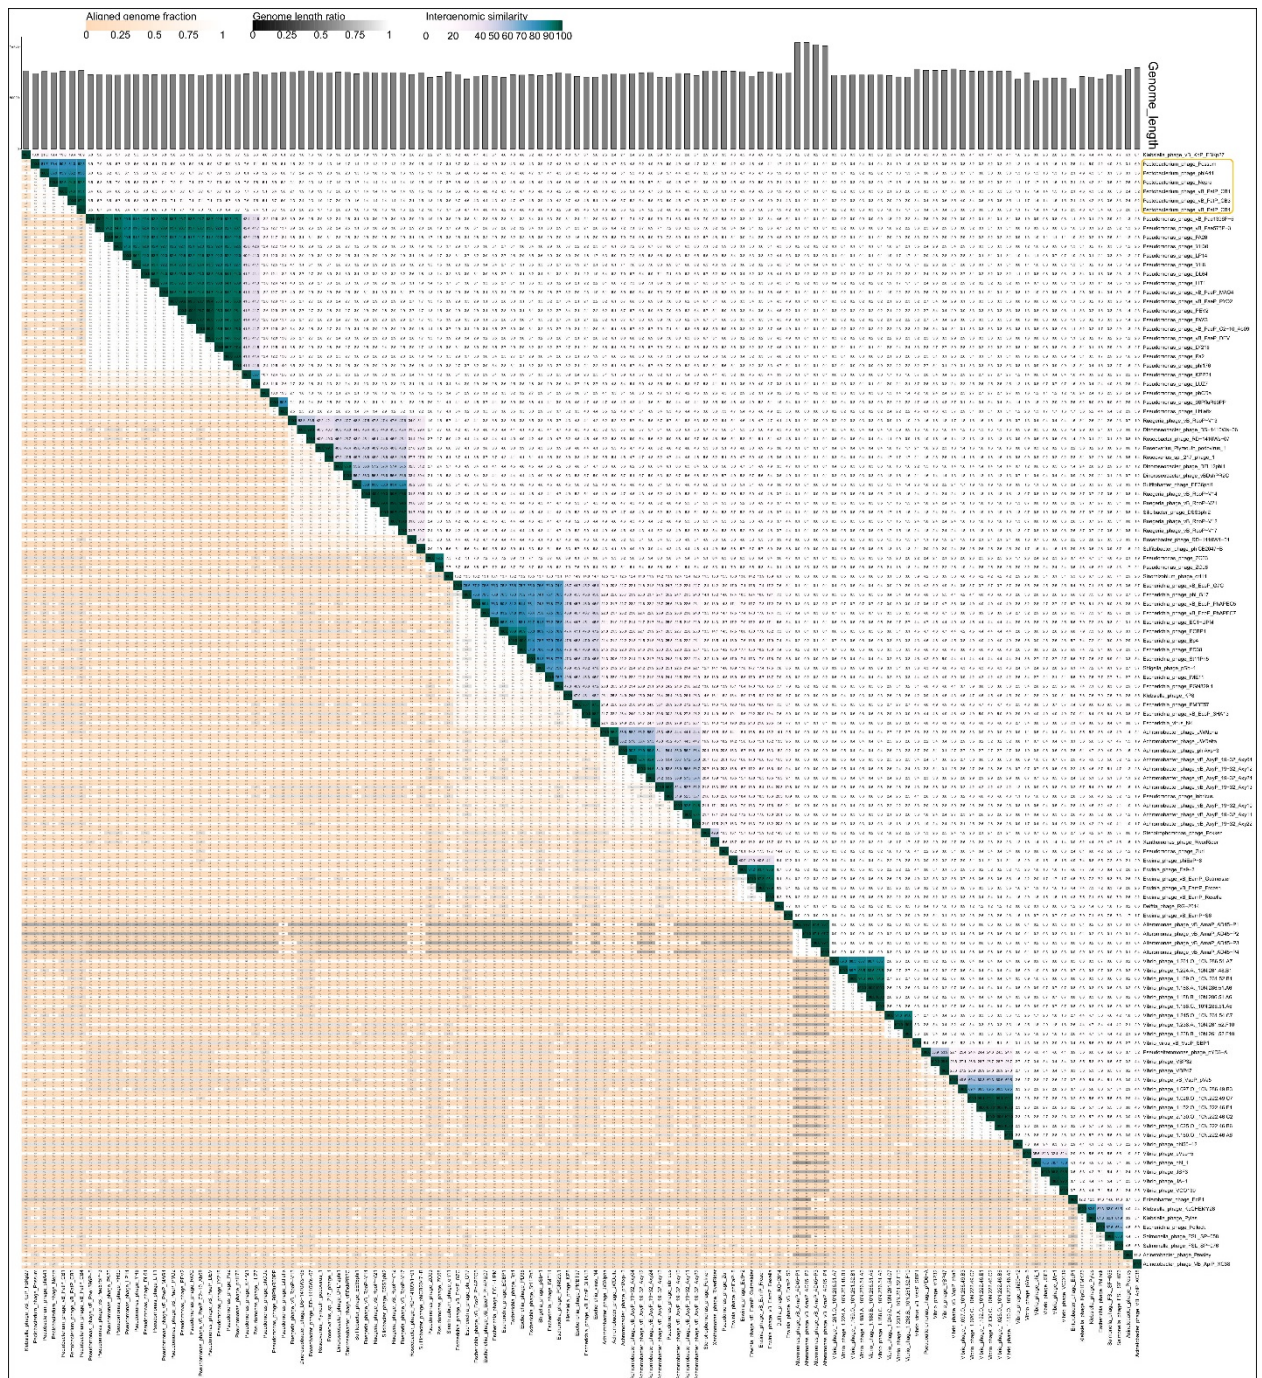

VIRIDIC generated heatmap of 118 *Schitoviridae* phages and four related *Aeromonas* phages. The heatmap incorporates intergenomic similarity values (right half) and alignment indicators (left half and top annotation). In the right half, the colour coding indicates the clustering of the phage genomes based on intergenomic similarity. The numbers represent the similarity values for each genome pair, rounded to the first decimal. In the left half, three indicator values are represented for each genome pair, from top to bottom: aligned fraction genome 1 (for the genome found in this row), genome length ratio (for the two genomes in this pair) and aligned fraction genome 2 (for the genome found in this column). *Pectobacterium* phages are clustered with an intergenomic similarity higher than the genus threshold of 70%.

**Figure S3.** VIRIDIC generated heatmap of 118 *Schitoviridae* phages and four related *Aeromonas* phages. The heatmap incorporates intergenomic similarity values (right half) and alignment indicators (left half and top annotation). In the right half, the colour coding indicates the clustering of the phage genomes based on intergenomic similarity. The numbers represent the similarity values for each genome pair, rounded to the first decimal. In the left half, three indicator values are represented for each genome pair, from top to bottom: aligned fraction genome 1 (for the genome found in this row), genome length ratio (for the two genomes in this pair), and aligned fraction genome 2 (for the genome found in this column). *Pectobacterium* phages are clustered with an intergenomic similarity higher than the genus threshold of 70%.





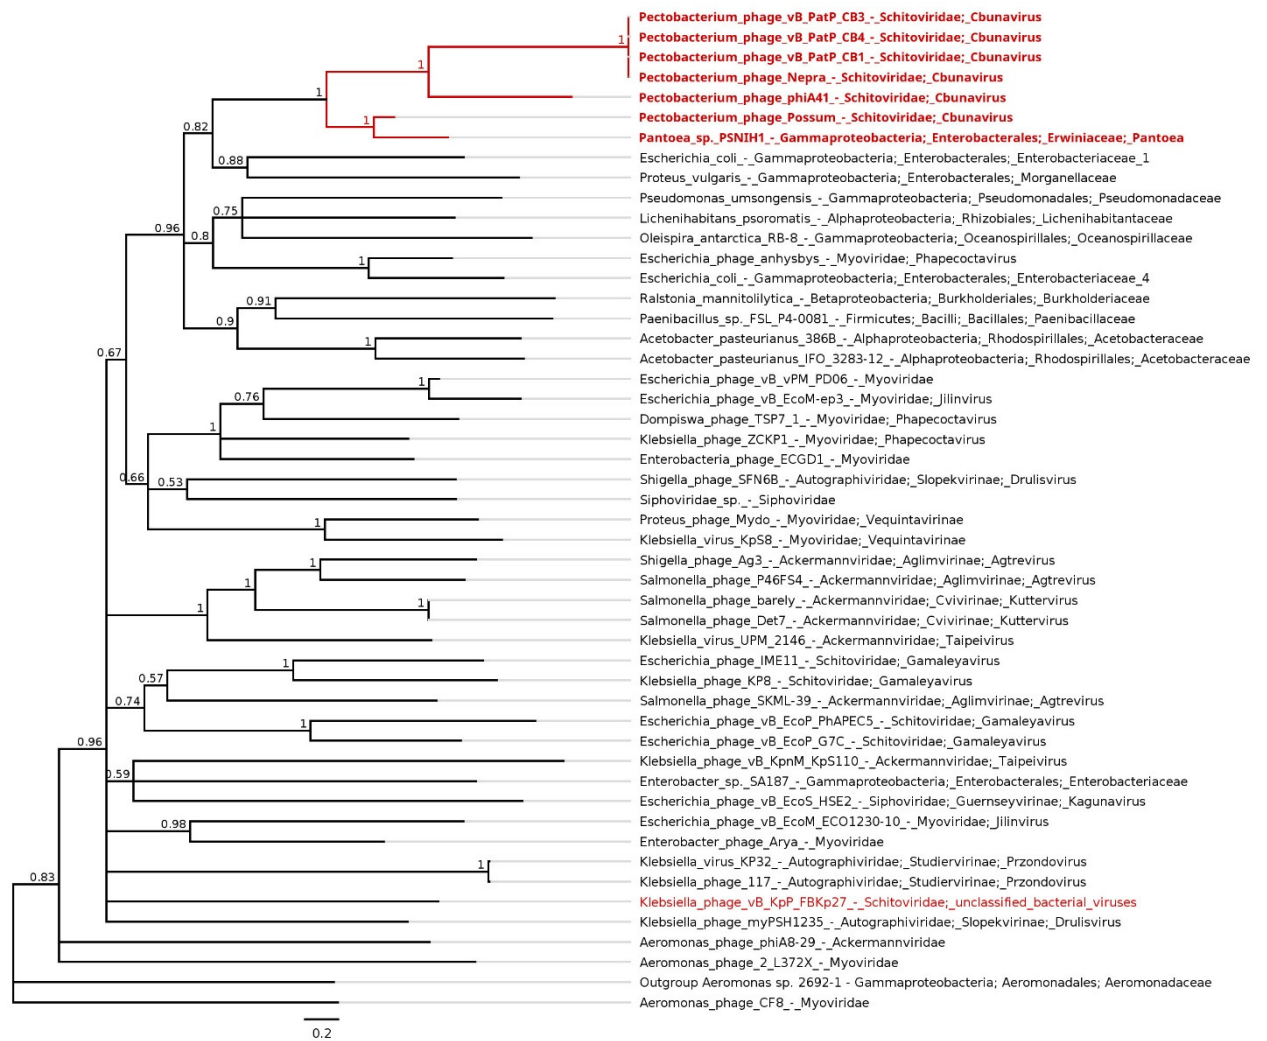

Phylogenetic tree obtained with MrBayes, based on the amino acid sequences homologues to Possum tail fibre protein gp66. Bayesian posterior probabilities are indicated above their branch. The scale bar shows 0.2 estimated substitutions per site and the tree was rooted to representing *Alteromonas* phages vB\_AmaP\_AD45-P1; 4,000,000 generations sampled every 200 generations, with an average standard deviation of split frequencies of 0.027;

**Figure S5.** Phylogenetic tree obtained with MrBayes, based on the amino acid sequences homologues to Possum tail fiber protein gp66. Bayesian posterior probabilities are indicated above their branch. The scale bar shows 0.2 estimated substitutions per site, and the tree was rooted to representing *Alteromonas* phages vB\_AmaP\_AD45-P1; 4,000,000 generations sampled every 200 generations, with an average standard deviation of split frequencies of 0.027.

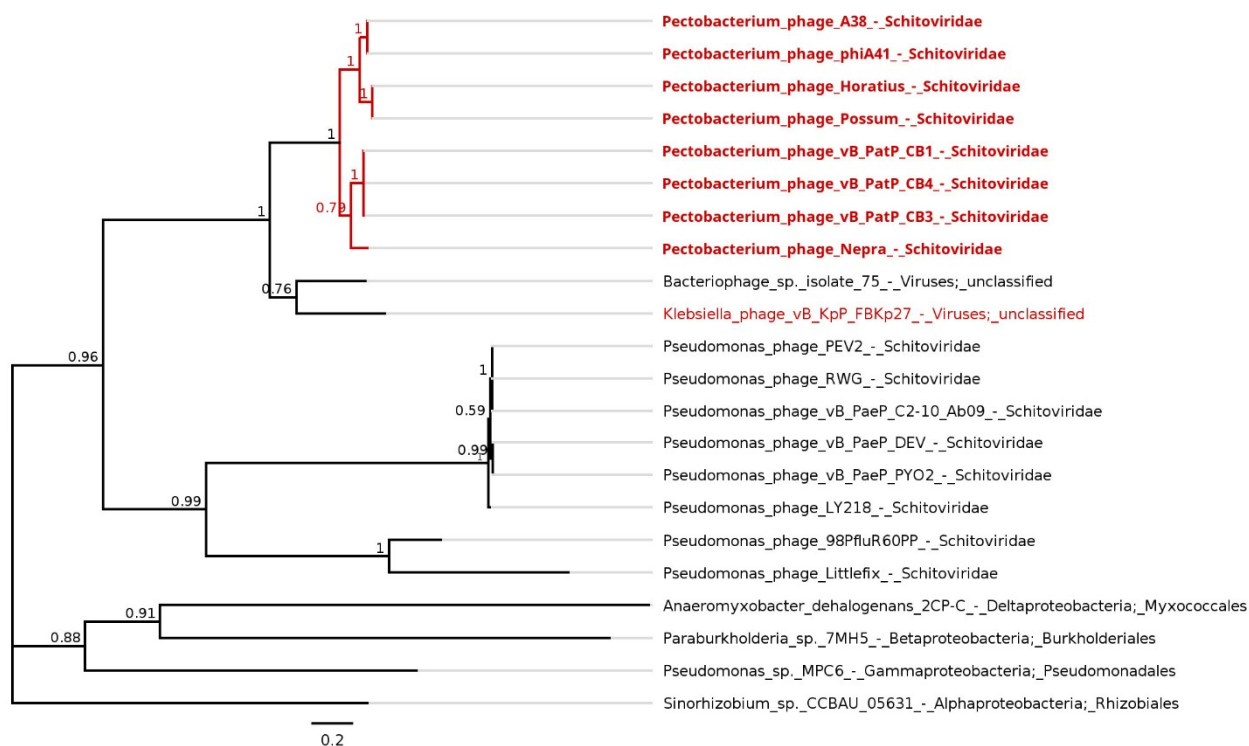

Phylogenetic tree obtained with MrBayes, based on the amino acid sequences homologues to Possum tail fibre protein gp67. Bayesian posterior probabilities are indicated above their branch. The scale bar shows 0.2 estimated substitutions per site and the tree was rooted to representing *Sinorhizobium* sp. CCBAU\_05631; 2,000,000 generations sampled every 200 generations, with an average standard deviation of split frequencies of 0.0033;

**Figure S6.** Phylogenetic tree obtained with MrBayes, based on the amino acid sequences homologues to Possum tail fiber protein gp67. Bayesian posterior probabilities are indicated above their branch. The scale bar shows 0.2 estimated substitutions per site, and the tree was rooted to represent *Sinorhizobium* sp. CCBAU\_05631; 2,000,000 generations sampled every 200 generations, with an average standard deviation of split frequencies of 0.0033.

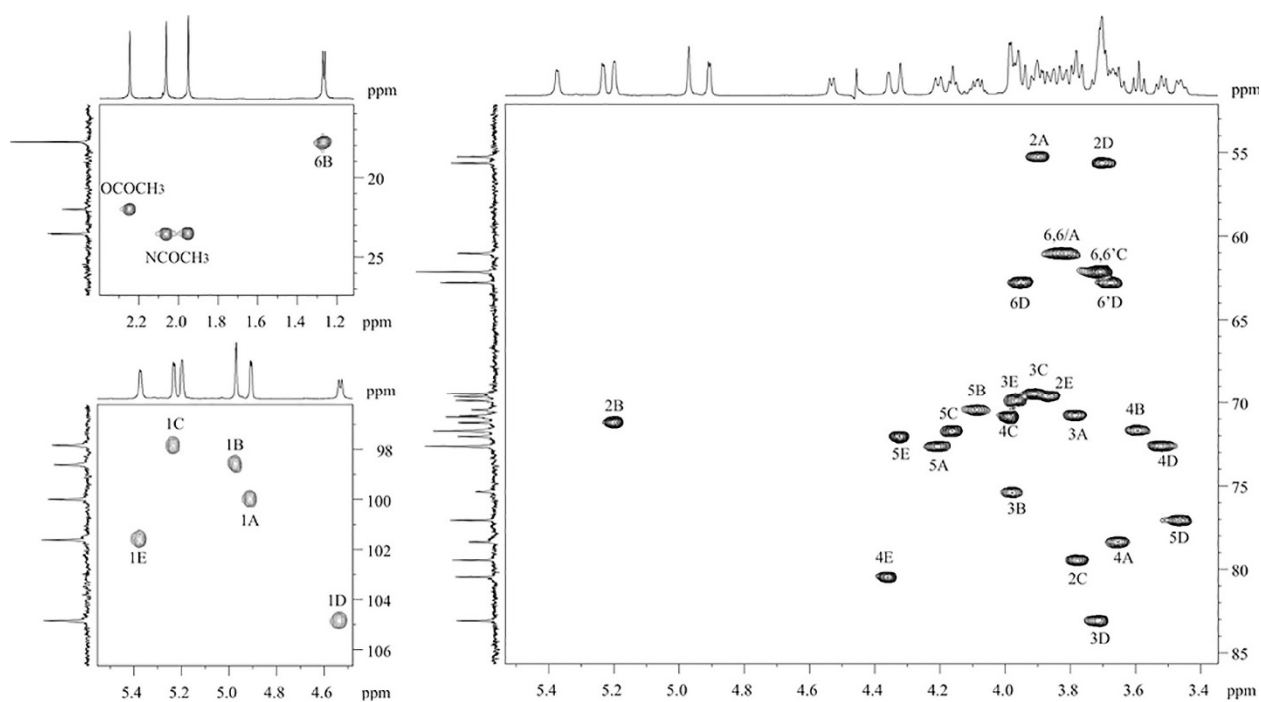

Parts of a  $^1\text{H},^{13}\text{C}$  HSQC spectrum of the OPS. Arabic numbers refer to carbons in sugar residues denoted by letters as shown in Figure 6 and Table S6

**Figure S7.** Parts of a  $^1\text{H},^{13}\text{C}$  HSQC spectrum of the OPS. Arabic numbers refer to carbons in sugar residues denoted by letters as shown in Figure 6 and Table S6.

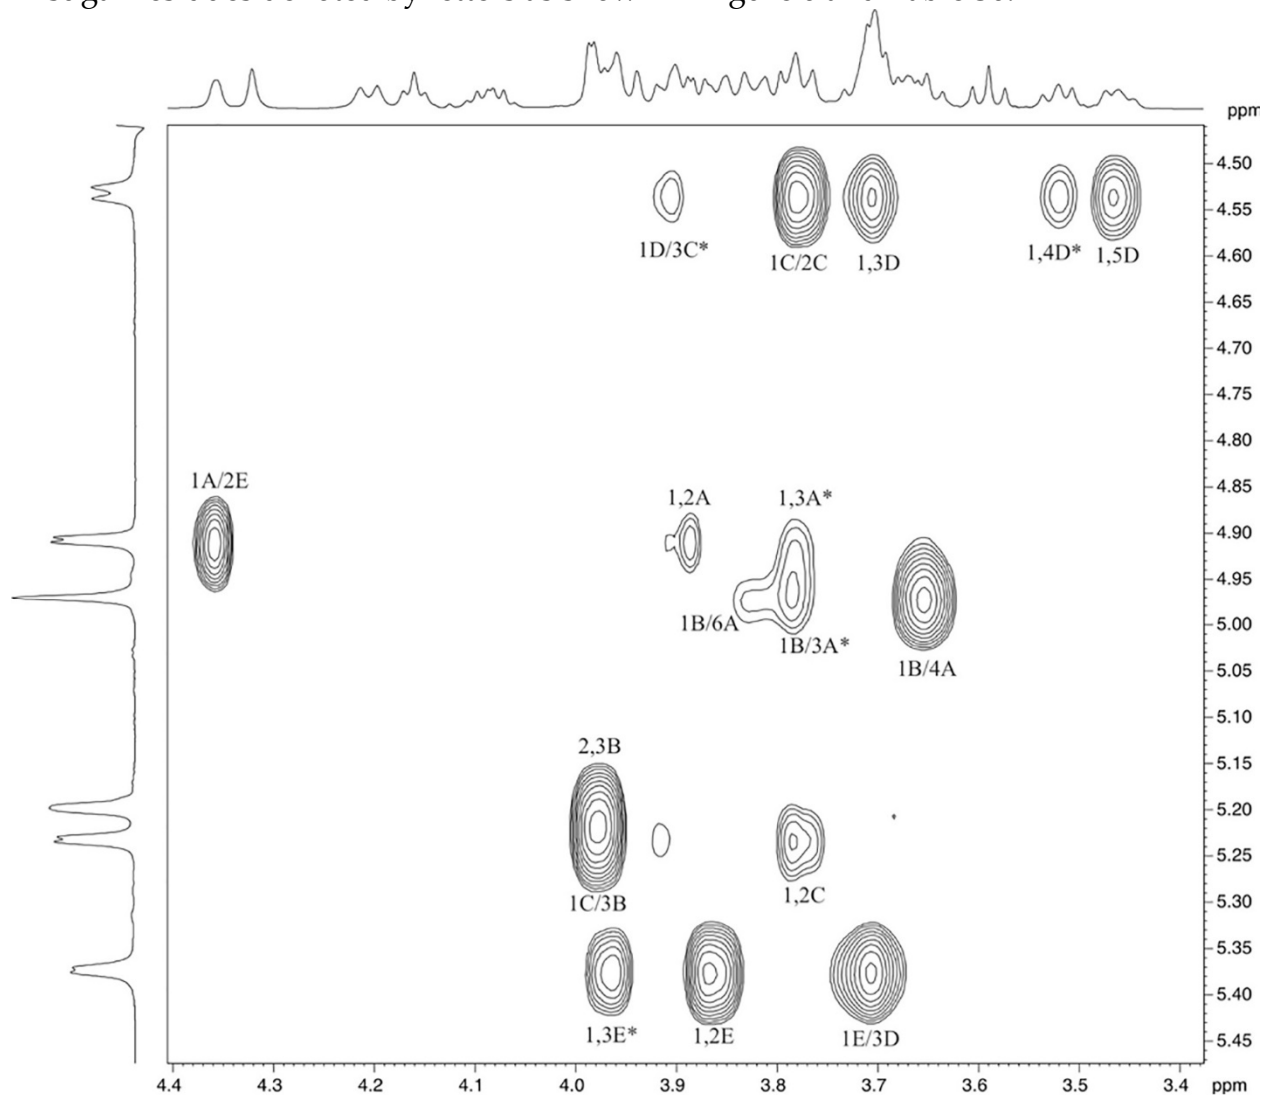

Part of a  $^1\text{H},^1\text{H}$  ROESY spectrum of the OPS. Arabic numbers refer to protons in sugar residues denoted by letters as shown in Figure 6 and Table S6

**Figure S8.** Part of a  $^1\text{H},^1\text{H}$  ROESY spectrum of the OPS. Arabic numbers refer to protons in sugar residues denoted by letters as shown in Figure 6 and Table S6.

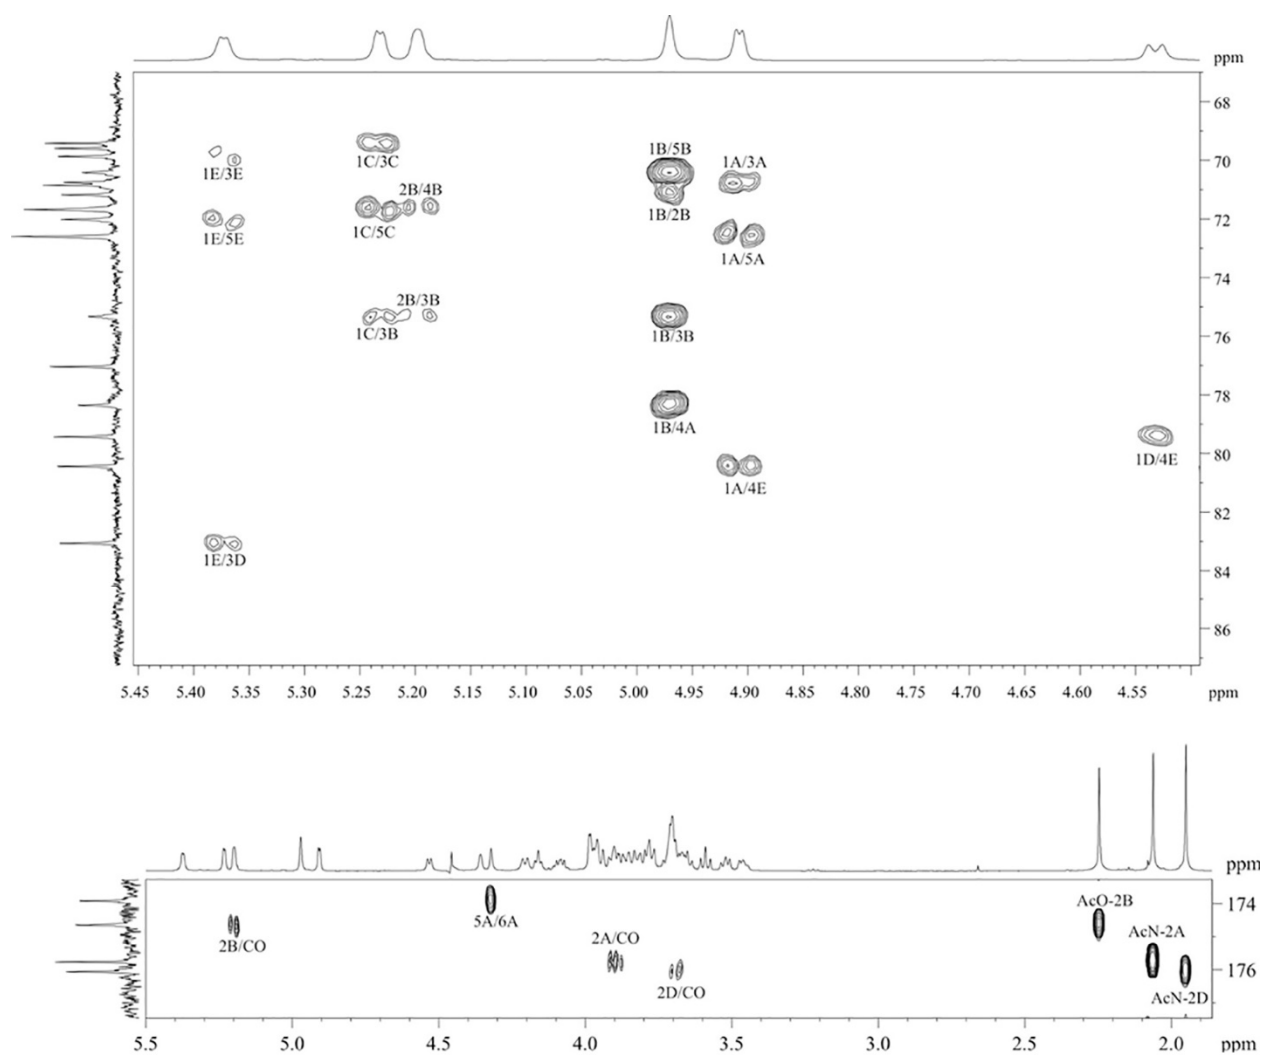

Parts of a  $^1\text{H}$ ,  $^{13}\text{C}$  HMBC spectrum of the OPS. Arabic numbers before slash refer to protons and those after slash to carbons in sugar residues denoted by letters as shown in Figure 6 and Table S6

**Figure S9.** Parts of a  $^1\text{H}$ ,  $^{13}\text{C}$  HMBC spectrum of the OPS. Arabic numbers before slash refer to protons and those after slash to carbons in sugar residues denoted by letters as shown in Figure 6 and Table S6.



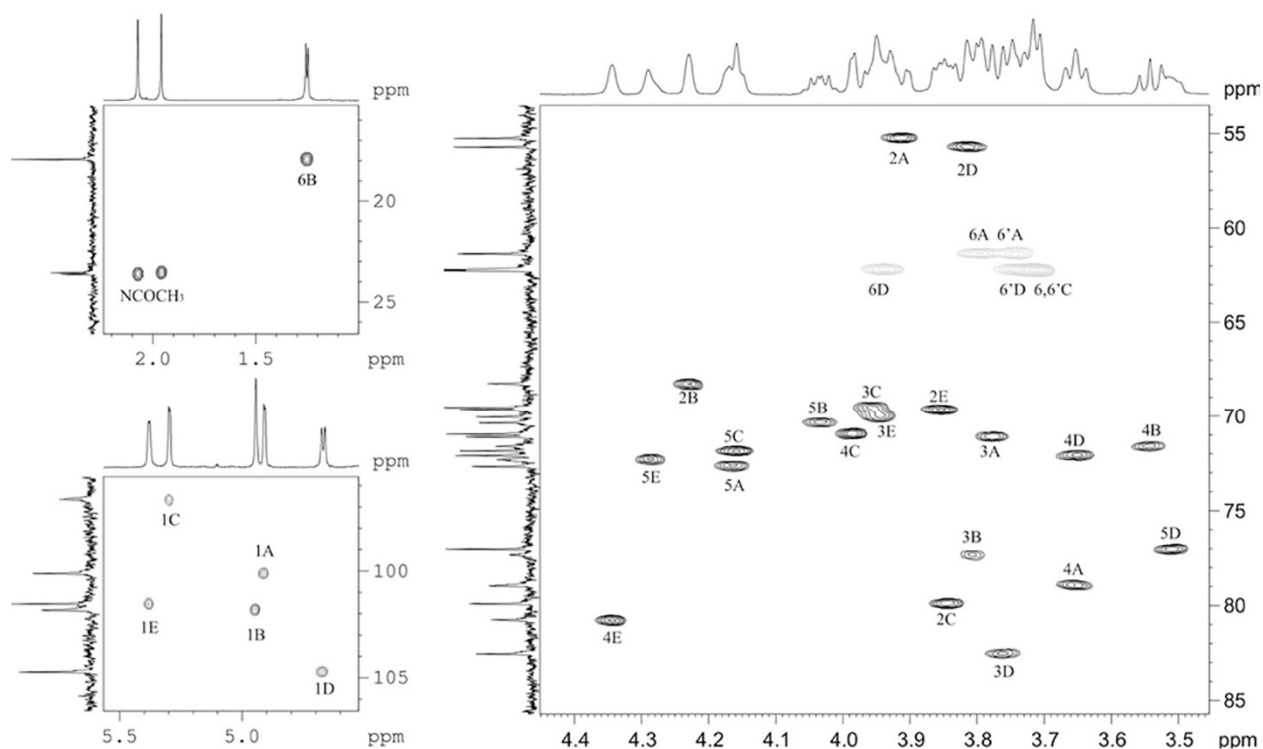

Parts of a  $^1\text{H},^{13}\text{C}$  HSQC spectrum of the MPS. Arabic numbers refer to carbons in sugar residues denoted by letters as shown in Figure 6 and Table S6

**Figure S10.** Parts of a  $^1\text{H},^{13}\text{C}$  HSQC spectrum of the MPS. Arabic numbers refer to carbons in sugar residues denoted by letters as shown in Figure 6 and Table S6.

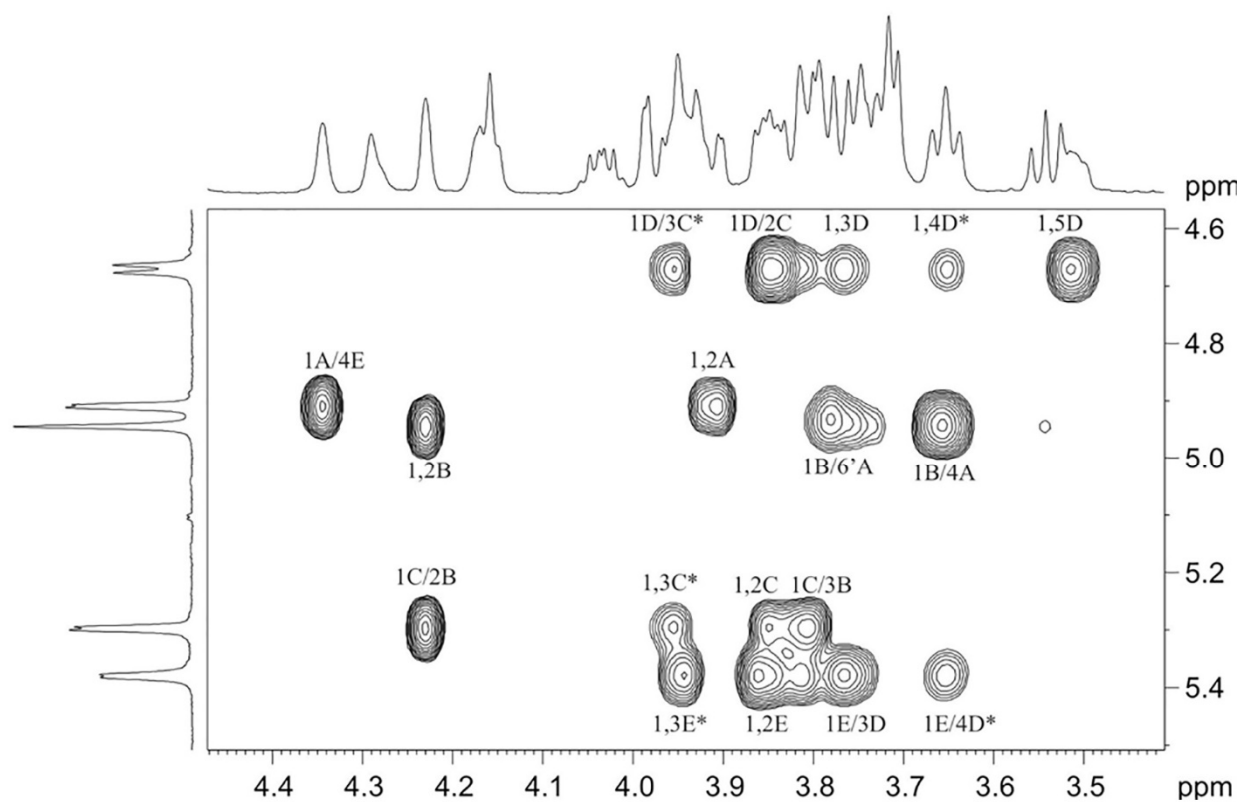

Part of a  $^1\text{H},^1\text{H}$  ROESY spectrum of the MPS. Arabic numbers refer to protons in sugar residues denoted by letters as shown in Figure 6 and Table S6

**Figure S11.** Part of a  $^1\text{H},^1\text{H}$  ROESY spectrum of the MPS. Arabic numbers refer to protons in sugar residues denoted by letters as shown in Figure 6 and Table S6.

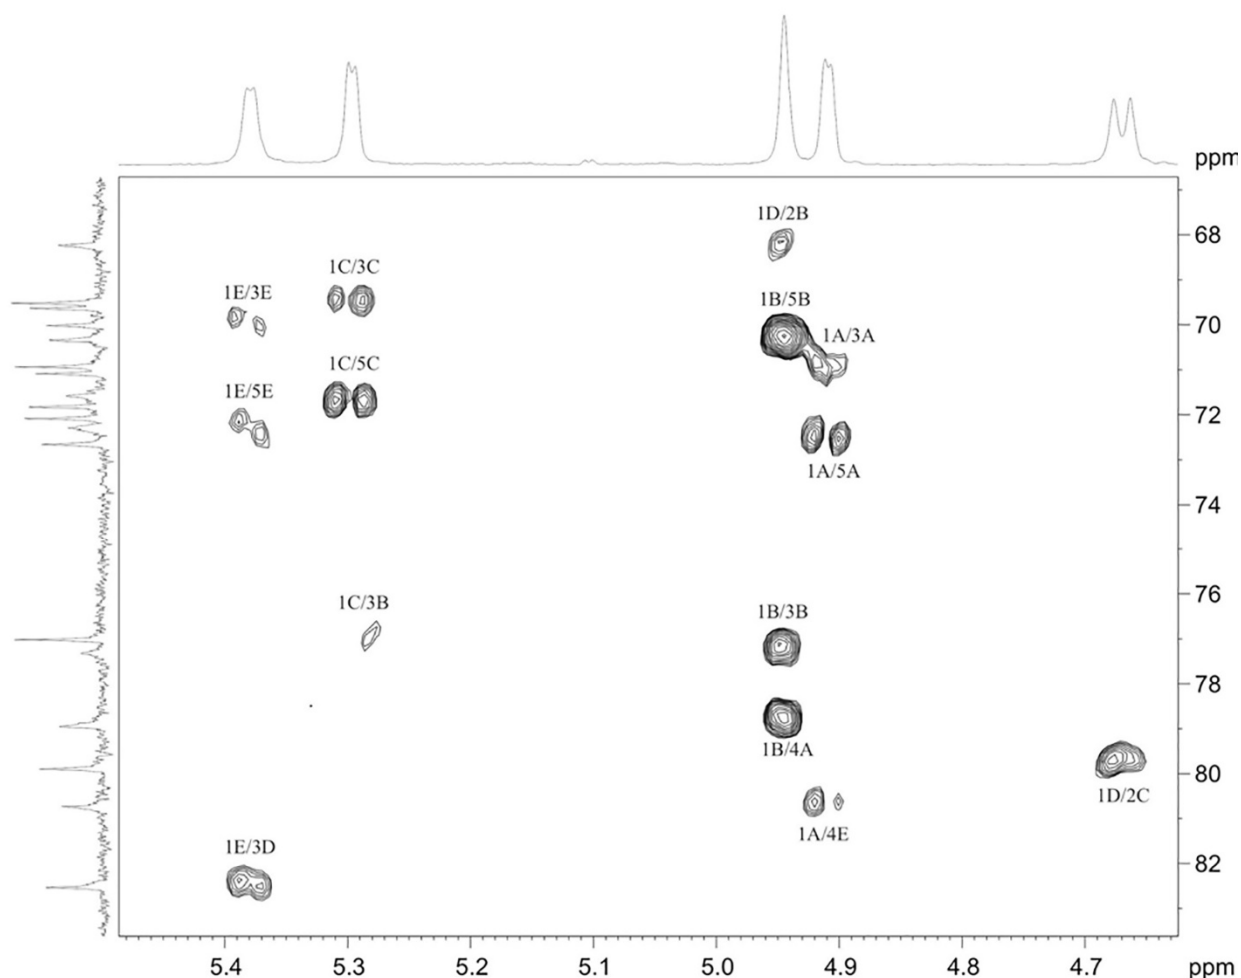

Part of a  $^1\text{H},^{13}\text{C}$  HMBC spectrum of the MPS. Arabic numbers before slash refer to protons and those after slash to carbons in sugar residues denoted by letters as shown in Figure 6 and Table S6

**Figure S12.** Part of a  $^1\text{H},^{13}\text{C}$  HMBC spectrum of the MPS. Arabic numbers before slash refer to protons, and those after slash to carbons in sugar residues denoted by letters as shown in Figure 6 and Table S6.

**Table S1.** Host Range of bacteriophages Possum and Horatius.

| Nº | Strain | Alternative name | Species    | Origin        | Genome            | Possum | Horatius |
|----|--------|------------------|------------|---------------|-------------------|--------|----------|
| 1  | F002   | PB69             | <i>Pve</i> | Moscow Region | NZ_PDXY00000000.1 | -      | -        |
| 2  | F016   |                  | <i>Pve</i> | Moscow Region |                   | -      | -        |
| 3  | F018   |                  | <i>Pve</i> | Moscow Region |                   | -      | -        |
| 4  | F020   |                  | <i>Pve</i> | Moscow Region |                   | -      | -        |
| 5  | F021   |                  | <i>Pve</i> | Moscow Region |                   | -      | -        |
| 6  | F040   |                  | <i>Pve</i> | Moscow Region |                   | -      | -        |
| 7  | F131   | 12a              | <i>Pve</i> | VIZR          | NZ_PDVW00000000.1 | +      | +        |

|    |      |          |                |                  |                       |   |   |
|----|------|----------|----------------|------------------|-----------------------|---|---|
| 8  | F135 |          | <i>Pve</i>     | Moscow<br>Region | NZ_PDVX000000<br>00.1 | - | - |
| 9  | F015 | D6       | <i>Pca/Pve</i> | Moscow           |                       | - | - |
| 10 | F017 | 246 / I7 | <i>Pca/Pve</i> | Moscow           |                       | - | - |
| 11 | F022 | 2.4 / F1 | <i>Pca/Pve</i> | Tomsk            |                       | - | - |
| 12 | F024 | A7       | <i>Pca/Pve</i> | Lithuania        |                       | - | - |
| 13 | F025 | B9       | <i>Pca/Pve</i> | Moscow           |                       | - | - |
| 14 | F027 | D1       | <i>Pca/Pve</i> | Moscow           |                       | - | - |
| 15 | F047 | 10b      | <i>Pca/Pve</i> | Moscow           |                       | - | - |
| 16 | F050 | 10a      | <i>Pca/Pve</i> | Moscow           |                       | - | - |
| 17 | F061 | 35 / F8  | <i>Pca/Pve</i> | Ethiopia         |                       | - | - |
| 18 | F062 | 246 / I8 | <i>Pca/Pve</i> | Moscow           |                       | - | - |
| 19 | F063 | D3       | <i>Pca/Pve</i> | Unknown          |                       | - | - |
| 20 | F064 | 520 / F6 | <i>Pca/Pve</i> | Moscow           |                       | - | - |
| 21 | F073 | 5        | <i>Pca/Pve</i> | Unknown          |                       | - | - |
| 22 | F077 | B6       | <i>Pca/Pve</i> | Ethiopia         |                       | - | - |
| 23 | F092 | E2       | <i>Pca/Pve</i> | Moscow           |                       | - | - |
| 24 | F099 | 518 / E8 | <i>Pca/Pve</i> | Moscow           |                       | - | - |
| 25 | F111 | 301 / I8 | <i>Pca/Pve</i> | Moscow           |                       | - | - |
| 26 | F121 | C8       | <i>Pca/Pve</i> | Moscow           |                       | - | - |
| 27 | F124 | 2019.14  | <i>Pca/Pve</i> | Tver             |                       | - | - |
| 28 | F133 | C1       | <i>Pca/Pve</i> | Tyumen           |                       | - | - |
| 29 | F136 |          | <i>Pca/Pve</i> | Bryansk          |                       | - | - |
| 30 | F061 |          | <i>Pca</i>     | Ethiopia         |                       | - | - |
| 31 | F160 |          | <i>Pca</i>     | VKPM             | NZ_JQHJ0000000<br>0.1 | - | - |
| 32 | F164 | PB31     | <i>Paq</i>     | Moscow<br>Region |                       | - | - |
| 33 | F004 | PB72     | <i>Pat</i>     | Moscow<br>Region | NZ_PDDK000000<br>00.1 | - | - |
| 34 | F041 |          | <i>Pat</i>     | Moscow<br>Region |                       | - | - |
| 35 | F048 |          | <i>Pat</i>     | Moscow<br>Region |                       | - | - |
| 36 | F162 | SCRI1043 | <i>Pat</i>     | Scotland         | NC_004547             | - | - |
| 37 | F163 | 21A      | <i>Pat</i>     | Belarus          | NZ_CP009125           | - | - |
| 38 | F126 |          | <i>Pbr</i>     | Samara<br>Region | RRYQ00000000          | - | - |
| 39 | F152 |          | <i>Pbr</i>     | Moscow<br>Region | PJDM00000000          | - | - |

|    |      |      |                                                |                 |                        |   |   |
|----|------|------|------------------------------------------------|-----------------|------------------------|---|---|
| 40 | F157 |      | <i>Pbr</i>                                     | Moscow Region   | PJDL00000000           | - | - |
| 41 | F035 |      | <i>Ppar</i>                                    | Kaluga Region   |                        | - | - |
| 42 | F148 | PB20 | <i>Ppar</i>                                    | Moscow Region   | NZ_PDDJ00000000<br>0.1 | - | - |
| 43 | F149 | PB21 | <i>Ppar</i>                                    | Tver region     |                        | - | - |
| 44 | F174 |      | <i>Ppar</i>                                    | Tver region     |                        | - | - |
| 45 | F109 |      | <i>Ppol</i>                                    | Ethiopia        |                        | - | - |
| 46 | F056 |      | <i>Ddi</i>                                     | Moscow Region   |                        | - | - |
| 47 | F085 |      | <i>Ddi</i>                                     | Moscow Region   |                        | - | - |
| 48 | F127 |      | <i>Ddi</i>                                     | Kaluga Region   |                        | - | - |
| 49 | F012 |      | <i>Dso</i>                                     | Voronezh Region | NZ_PGOJ00000.1         | - | - |
| 50 | F155 | PB36 | <i>Dso</i>                                     | Moscow Region   |                        | - | - |
| 51 | F100 |      | <i>unidentified<br/>pectolytic<br/>isolate</i> | Unknown         |                        | - | - |
| 52 | F106 |      | <i>unidentified<br/>pectolytic<br/>isolate</i> | Unknown         |                        | - | - |

"+" Display phage lytic activity concerning bacterial strains. For strains resistant to phages, the "-" sign is indicated. *Pve* – *Pectobacterium versatile*, *Pve/Pca* - strains previously attributed as *Pca*, having a PCR fingerprint similar to *Pve*, *Pca* – *P.carotovorum*, *Pat* – *P. atrosepticum*, *Pbr* – *P. brasiliense*, *Ppar* – *P. parmentieri*, *Ppol* – *P. Polaris*, *Ddi* – *Dickeya diantctica*, *Dso* – *D. solani*.

**Table S2.** Functional assignments of *Pectobacterium* phage Possum genes.

**Table S3.** Functional assignments of *Pectobacterium* phage Horatius genes.

**Table S4.** Unique genes belonging to *Pectobacterium* N4-like phages and *Klebsiella* phage vB\_KpP\_FBKp27 found with BLAST search (E-value <10<sup>-5</sup>).

**Table S5.** Average nucleotide identity (ANI) between *Pectobacterium* phage Possum and all phage genomes deposited in the NCBI GenBank (calculated with orthoANIu, threshold 0.5).

**Table S6.** <sup>1</sup>H and <sup>13</sup>C NMR chemical shifts (δ, ppm) of the O-specific polysaccharide (OPS) and modified (O-deacetylated) polysaccharide (MPS) from *P. versatile* F131.

| Sugar residue                | Chemical shift |                   |             |             |             |                   |
|------------------------------|----------------|-------------------|-------------|-------------|-------------|-------------------|
|                              | C-1            | C-2               | C-3         | C-4         | C-5         | C-6               |
|                              | <i>H-1</i>     | <i>H-2</i>        | <i>H-3</i>  | <i>H-4</i>  | <i>H-5</i>  | <i>H-6,6'</i>     |
| OPS <sup>a</sup>             |                |                   |             |             |             |                   |
| →4)-α-D-GlcpNAc-(1→ <b>A</b> | 100.0          | 55.2 <sup>c</sup> | 70.8        | 78.3        | 72.6        | 61.0              |
|                              | <i>4.91</i>    | <i>3.89</i>       | <i>3.79</i> | <i>3.66</i> | <i>4.21</i> | <i>3.81, 3.84</i> |
| →3)-α-L-Rhap2Ac-(1→ <b>B</b> | 98.6           | 71.1 <sup>b</sup> | 75.4        | 71.7        | 70.5        | 17.8              |
|                              | <i>4.97</i>    | <i>5.20</i>       | <i>3.99</i> | <i>3.59</i> | <i>4.09</i> | <i>1.27</i>       |
| →2)-α-D-Galp-(1→ <b>C</b>    | 97.8           | 79.5              | 69.5        | 70.9        | 71.7        | 62.1              |
|                              | <i>5.24</i>    | <i>3.78</i>       | <i>3.91</i> | <i>3.99</i> | <i>4.17</i> | <i>3.71, 3.71</i> |
| →3)-β-D-GlcpNAc-(1→ <b>D</b> | 104.9          | 55.6 <sup>a</sup> | 83.1        | 72.6        | 77.1        | 62.8              |
|                              | <i>4.53</i>    | <i>3.70</i>       | <i>3.72</i> | <i>3.52</i> | <i>3.47</i> | <i>3.68, 3.95</i> |
| →4)-α-D-GalpA-(1→ <b>E</b>   | 101.6          | 69.6              | 69.9        | 80.5        | 72.1        | 173.9             |
|                              | <i>5.37</i>    | <i>3.86</i>       | <i>3.97</i> | <i>4.36</i> | <i>4.32</i> |                   |
| MPS <sup>b</sup>             |                |                   |             |             |             |                   |
| →4)-α-D-GlcpNAc-(1→ <b>A</b> | 100.2          | 55.3 <sup>b</sup> | 71.1        | 79.0        | 72.7        | 61.4              |
|                              | <i>4.91</i>    | <i>3.92</i>       | <i>3.78</i> | <i>3.65</i> | <i>4.17</i> | <i>3.75, 3.80</i> |
| →3)-α-L-Rhap-(1→ <b>B</b>    | 101.8          | 68.3              | 77.4        | 71.6        | 70.3        | 18.0              |
|                              | <i>4.95</i>    | <i>4.23</i>       | <i>3.81</i> | <i>3.54</i> | <i>4.04</i> | <i>1.25</i>       |
| →2)-α-D-Galp-(1→ <b>C</b>    | 96.7           | 79.9              | 69.6        | 71.0        | 71.9        | 62.3              |
|                              | <i>5.30</i>    | <i>3.85</i>       | <i>3.96</i> | <i>3.99</i> | <i>4.16</i> | <i>3.71, 3.71</i> |
| →3)-β-D-GlcpNAc-(1→ <b>D</b> | 104.7          | 55.7 <sup>a</sup> | 82.6        | 72.1        | 77.0        | 62.7              |
|                              | <i>4.67</i>    | <i>3.82</i>       | <i>3.76</i> | <i>3.65</i> | <i>3.52</i> | <i>3.75, 3.94</i> |
| →4)-α-D-GalpA-(1→ <b>E</b>   | 101.6          | 69.2              | 70.0        | 80.7        | 72.3        | 174.6             |
|                              | <i>5.38</i>    | <i>3.86</i>       | <i>3.95</i> | <i>4.35</i> | <i>4.29</i> |                   |

<sup>1</sup>H NMR chemical shifts are italicized.

Signals for the N-acetyl groups are at <sup>a</sup>δ<sub>C</sub> 23.6 -23.7 (CH<sub>3</sub>) and 175.9-176.2 (C=O), δ<sub>H</sub> 1.96 and 2.07 (CH<sub>3</sub>);

<sup>b</sup>δ<sub>C</sub> 23.5-23.6 (CH<sub>3</sub>) and 175.9-176.1 (C=O), and δ<sub>H</sub> 1.95 and 2.06 (CH<sub>3</sub>); the O-acetyl group at δ<sub>C</sub> 22.0 (CH<sub>3</sub>) and 174.7 (C=O), and δ<sub>H</sub> 2.25 (CH<sub>3</sub>).
